1  
2  
3  
4  
5  
6  
7  
8  
9  
10  
11  
12  
13  
14  
15  
16  
17  
18  
19  
20  
21  
22  
23  
24  
25  
26  
27  
28  
29  
30  
31  
32  
33  
34  
35  
36  
37  
38  
39  
40  
41  
42  
43  
44  
45  
46  
47  
48  
49  
50  
51

## **Type III interferon signaling restricts Enterovirus 71 infection of goblet cells**

Charles Good<sup>1,2</sup>, Alexandra I. Wells<sup>1,2</sup>, Carolyn B. Coyne<sup>1,2\*</sup>

<sup>1</sup>Department of Pediatrics, University of Pittsburgh School of Medicine, <sup>2</sup>Center for Microbial Pathogenesis, Children's Hospital of Pittsburgh of UPMC, Pittsburgh, PA 15224 USA

Running title: EV71 infects goblet cells

\*Address correspondence:

Carolyn Coyne, PhD  
9116 Rangos Research Center  
Children's Hospital of Pittsburgh of UPMC  
One Children's Hospital Way  
4401 Penn Avenue  
Pittsburgh, PA 15224  
Phone (412) 692-7519  
Email [coynec2@pitt.edu](mailto:coynec2@pitt.edu); [carolyn.coyne3@chp.edu](mailto:carolyn.coyne3@chp.edu)

52 **Abstract**

53 Recent worldwide outbreaks of enterovirus (EV71) have caused major epidemics of hand, foot,  
54 and mouth disease (HFMD) with severe neurological complications, including acute flaccid  
55 paralysis. EV71 is transmitted by the enteral route, but very little is known about the mechanisms  
56 it utilizes to cross the human gastrointestinal (GI) tract. Using primary human intestinal epithelial  
57 monolayers, we show that EV71 infects the GI epithelium from the apical surface, where it  
58 preferentially infects goblet cells. Unlike echovirus 11 (E11), an enterovirus that infects  
59 enterocytes, EV71 infection did not alter epithelial barrier function, but did reduce the expression  
60 of a goblet cell-derived mucin, suggesting it alters goblet cell function. We also show that the  
61 intestinal epithelium responds to EV71 infection through the selective induction of type III IFNs,  
62 which potently restrict EV71 replication. Collectively, these findings define the early events  
63 associated with EV71 infections of the human intestinal epithelium and show that host IFN  
64 signaling controls replication in an IFN-specific manner.

65

66 **Introduction**

67 Enteroviruses are small (~30nm) single stranded RNA viruses that cause a broad  
68 spectrum of illness in humans. Disease manifestations of enterovirus infections can range from  
69 acute, self-limited febrile illness to meningitis, endocarditis, acute paralysis, and even death.  
70 Enterovirus 71 (EV71) has been associated with major epidemics of hand, foot, and mouth  
71 disease (HFMD) worldwide and severe neurological complications, including meningitis,  
72 encephalitis, and acute flaccid paralysis<sup>1</sup>. First identified in 1969<sup>2</sup>, EV71 outbreaks have occurred  
73 throughout the globe, with epidemics most commonly occurring in the Asia-Pacific region.  
74 Between 2008-2012, outbreaks of EV71 in China have been associated with over 7,000,000  
75 cases of HFMD and almost 2500 deaths<sup>3</sup>. The pediatric population is at greatest risk for  
76 developing EV71-associated complications, with the vast majority of fatalities occurring in children

77 below the age of two<sup>3-6</sup>. There are currently no approved therapeutics to treat or prevent EV71  
78 infections.

79 EV71 is transmitted by the fecal-oral route, where it targets the human gastrointestinal  
80 (GI) epithelium for host invasion. The mechanisms utilized by EV71 to cross the GI epithelial  
81 barrier remain largely unknown, owing in part to the lack of *in vivo* models to study EV71 infections  
82 by the enteral route. For example, modeling EV71 infections in mouse models is complex given  
83 the need to rely on the use of mouse adapted viral strains, animals lacking functional interferon  
84 (IFN) signaling, and/or mice overexpressing the human homolog of the primary EV71 receptor  
85 SCARB2<sup>7-12</sup>. Previous work in non-human primate models parallel the CNS complication  
86 associated with EV71 infections in humans, including when infected by the enteral route<sup>9, 13, 14</sup>.  
87 However, despite the development of these models, which provide platforms to determine the  
88 efficacy of EV71 vaccines and therapeutics in animals, the specific mechanisms by which EV71  
89 crosses the human GI epithelial barrier have yet to be defined.

90 The human GI epithelium is a complex cellular barrier composed of multiple cell types,  
91 including those of absorptive (enterocytes) and secretory (goblet, enteroendocrine, and Paneth)  
92 lineages. These diverse cell types are derived from Lgr5<sup>+</sup> stem cells located within the base of  
93 intestinal crypts, which differentiate into absorptive and secretory lineages<sup>15</sup>. Major advances in  
94 the development of *ex vivo* 'mini-gut' enteroid models, in which primary human intestinal crypts  
95 are isolated and cultured into epithelial structures that differentiate to contain the multiple cell  
96 types present in the human intestine<sup>16-18</sup>, have significantly expanded our understanding of enteric  
97 virus-GI interactions (reviewed in <sup>19</sup>). In previous work, we utilized enteroids isolated from human  
98 fetal small intestines to profile the susceptibility of the human intestine to enterovirus infections,  
99 using echovirus 11 (E11), coxsackievirus B (CVB) and EV71 as models<sup>20</sup>. We showed that E11  
100 exhibits a cell type specificity of infection and infects both enterocytes and enteroendocrine cells  
101 but is unable to infect goblet cells<sup>20</sup>, suggesting that enteroviruses exhibit a cell type specificity in  
102 their infections of the GI epithelium. However, during these studies, we noted that in contrast to

103 both E11 and CVB, EV71 replicated to low levels in human enteroids, although the mechanistic  
104 basis for this remained unclear<sup>20</sup>.

105         Although the crypt-based model utilized in our previous work has many advantages over  
106 standard cell line-based models, the culturing of crypts in Matrigel induces the formation of 3-D  
107 structures wherein the luminal (apical) domain faces inward and the basolateral domain faces the  
108 culture medium. This impacts the polarity by which viruses infect enteroids, restricts the ability to  
109 determine whether there is a polarity of viral entry and/or release, and precludes an assessment  
110 of alterations that may be induced to the epithelium by infection, such as loss of barrier function.  
111 Here, we developed a monolayer model using isolated human fetal crypts cultured on permeable  
112 porous membrane inserts, which leads to the formation of a single cell monolayer containing all  
113 of the distinct cell types present in the GI epithelium. Using this model, we found that E11 and  
114 EV71 exhibit differences in their ability to bind and infect from the apical or basolateral surfaces,  
115 with a strong basolateral polarity for E11 and an apical polarity for EV71. Interestingly, we found  
116 that whereas E11 targets enterocytes and abolishes epithelial structure and barrier function, EV71  
117 preferentially infects goblet cells and infection reduces the expression of a goblet cell-derived  
118 mucin. Lastly, we show that EV71 infection specifically induces the type III IFN IFN- $\lambda$ 2/3 and  
119 type I and III IFNs restrict enterovirus replication in a virus-specific manner, with type I IFN  
120 exhibiting the greatest restriction of E11 and type III IFNs preferentially restricting EV71. Our  
121 findings thus define the events associated with EV71 infections in the GI tract, which could lead  
122 to the identification of novel therapeutic targets and/or strategies to prevent or treat the  
123 pathogenesis and morbidity associated with infections by this virus.

124

## 125 **Results**

### 126 **Crypt-based monolayer model**

127 Previously, we grew enteroids generated from intestinal crypts isolated from human fetal small  
128 intestines cultured in Matrigel and infected these with E11, CVB, and EV71<sup>20</sup>. In this study, we

129 found that EV71 replicated poorly in comparison to other enteroviruses. However, the basis for  
130 this low level of infection was unclear. Given that enteroids cultured in Matrigel develop an apical  
131 surface facing into the lumen (**Figure 1A, Supplemental Figure 1A**), which is not accessible  
132 from the culture medium, we theorized that the low levels of EV71 replication in this model might  
133 result from the need to infect from the basolateral surface. We therefore determined whether  
134 direct culturing of isolated crypts on porous membrane transwell inserts would provide a model to  
135 access the apical and basolateral surfaces in an intact monolayer setting. To do this, we isolated  
136 intestinal crypts from human fetal small intestines and plated them directly onto T-clear transwell  
137 inserts in the presence of factors required to promote stem cell differentiation (R-spondin, Noggin,  
138 epidermal growth factor, Wnt3A, and the Rho Kinase inhibitor Y-27632) (**Supplemental Figure**  
139 **1B**). Similar models have been utilized from crypts isolated from the adult GI tract, which often  
140 requires growth as enteroids in Matrigel prior to disruption and subsequent transwell plating  
141 (reviewed in <sup>21</sup>). We found that fetal small intestine-derived crypts plated directly on transwell  
142 inserts developed into complete monolayers within 2-3 days post-plating and exhibited distinct  
143 apical and basolateral domains that contained distinct intestinal cell types such as mucin-2  
144 (MUC2) positive goblet cells and chromogranin A (CHGA)-positive enteroendocrine cells at the  
145 same ratio as crypts cultured in Matrigel (**Figure 1A, Supplemental Figure 1C**). Using RNASeq  
146 and RT-qPCR, we found that crypts plated directly in transwell inserts exhibited similar  
147 transcriptional profiles (**Supplemental Figure 1D**) and expression of markers of enterocytes  
148 (Sucrase-isomaltase (SI), Alkaline Phosphatase (ALPL), goblet cells (MUC2, MUC5AC, MUC13,  
149 MUC17), enteroendocrine cells (CHGA), Paneth cells (REG3A), and stem cells (OLFM4),  
150 although we did observe significantly lower expression of LGR5 (**Figure 1B, 1C**). In addition to  
151 developing a multicellular phenotype, crypt monolayers (hereafter referred to as human intestinal  
152 epithelium (HIE)) formed junctional complexes composed of both tight junctions (ZO-1) and  
153 adherens junctions (E-cadherin) and exhibited intact barrier function as assessed by high (>  
154 approximately 1000  $\Omega$ ) transepithelial resistance (TER) values (**Figure 1D, 1E**).

155

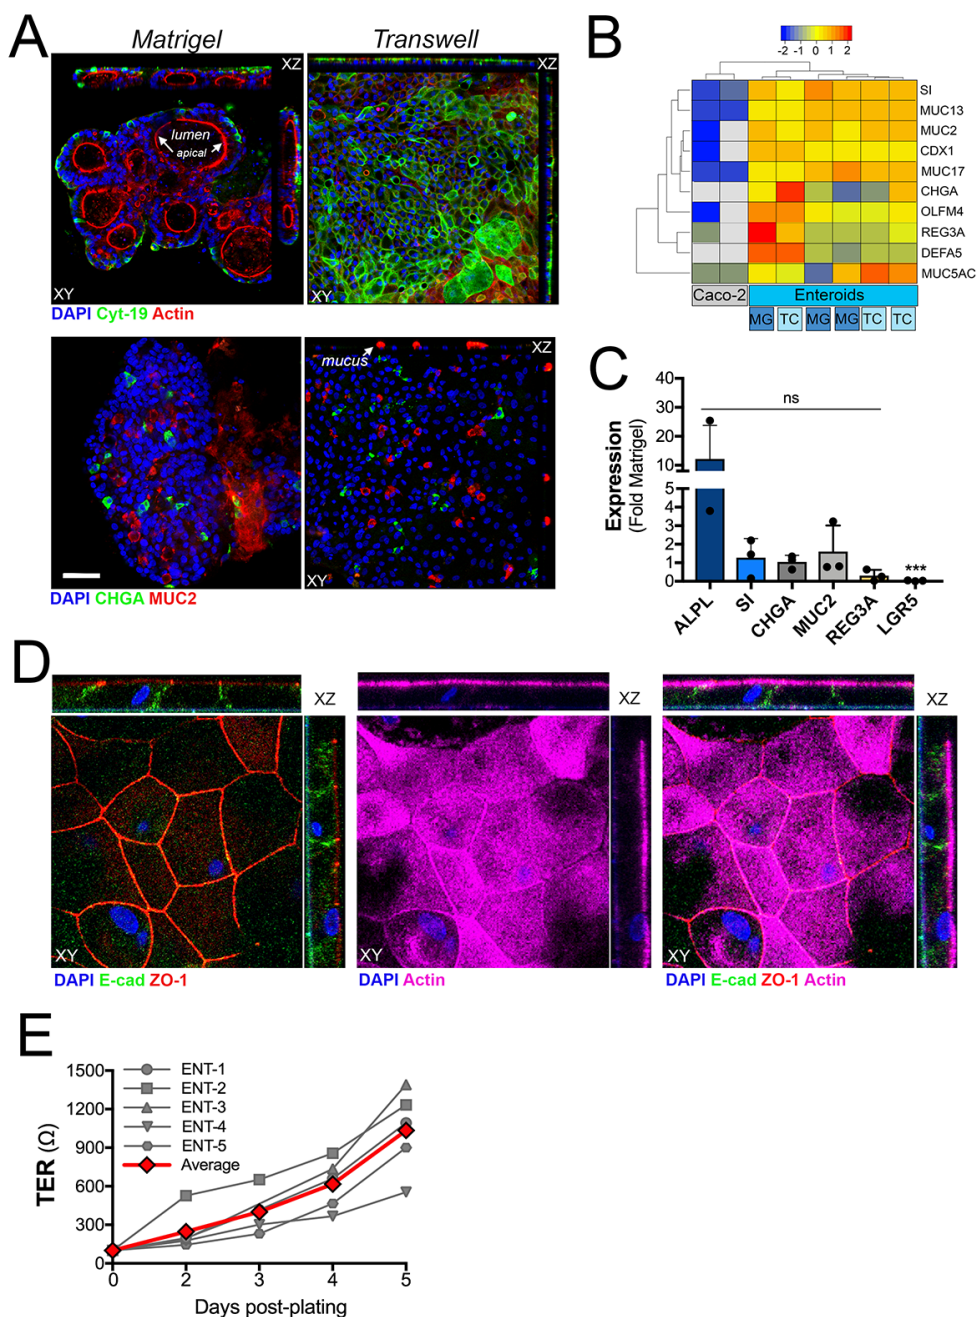

156

157

158 **Figure 1. Establishment of human fetal small intestinal-derived monolayer model. (A),**  
 159 **Confocal micrographs of isolated crypts grown in Matrigel (left) or on transwell T-clear insert (right)**  
 160 **for 6 days. Shown is immunofluorescence images from samples immunostained for cytokeratin-**  
 161 **19 (an epithelial marker) (green top) and actin (red, top) or chromogranin A (CHGA, an**  
 162 **enteroendocrine marker) (green, bottom) and mucin-2 (MUC2, a goblet marker) (red, bottom). In**  
 163 **all, DAPI-stained nuclei are shown in blue. At top and right of upper panel are xyz or xzy images**  
 164 **obtained by serial sectioning. (B), Hierarchical clustering heat map of differential gene expression**  
 165 **profiles (based on log<sub>2</sub> (RPKM) values) between two independent preparations of Caco-2 cells**  
 166 **and three matched independent human enteroid cultures plated in Matrigel (MG) or T-clear**

167 transwell inserts (TC) by RNAseq. Key at top (grey indicates no reads mapped). **(C)**, RT-qPCR  
168 for the indicated markers (alkaline phosphatase (ALPL), sucrase-isomaltase (SI), chromogranin  
169 A (CHGA), mucin-2 (MUC2), regenerating islet-derived protein 3 (REG3A), and leucine-rich  
170 repeat-containing G-protein coupled receptor 5 (LGR5) in three matched independent human  
171 enteroid cultures plated in Matrigel or T-clear transwell inserts. Data are shown as mean  $\pm$   
172 standard deviation as a fold change from Matrigel-plated enteroids. **(D)**, Confocal micrographs of  
173 isolated crypts grown on transwell T-clear inserts for 6 days. Shown is immunofluorescence  
174 images from samples immunostained for E-cadherin (an adherens junction marker, green), ZO-1  
175 (a tight junction marker, red) and actin (magenta). DAPI-stained nuclei are shown in blue. At top  
176 and right of upper panel are xyz or xzy images obtained by serial sectioning. **(E)**, Transepithelial  
177 resistance (TER, in  $\Omega$ ) values from five independent HIE cultures (ENT-1-5 in grey, two to three  
178 transwells were averaged per preparation). Average TER values from all preparations are shown  
179 in red.  
180

### 181 **EV71 preferentially infects HIE from the apical surface**

182 It is unknown whether enteroviruses exhibit a preferential polarity of binding or infection in primary  
183 HIE. To address this, we performed binding and infection assays from either the apical or  
184 basolateral surfaces in primary HIE. These studies revealed significant differences in the capacity  
185 of E11 and EV71 to bind and infect in a polarized manner. Whereas E11 exhibited an enhanced  
186 capacity to infect from the basolateral surface as assessed by the production of vRNA by RT-  
187 qPCR at 24hrs post-infection (p.i.), EV71 exhibited a much stronger preference for apical infection  
188 **(Figure 2A)**. Consistent with this, we found that EV71 preferentially binds to the apical surface of  
189 HIE as assessed by a qPCR-based binding assay **(Figure 2B)**. To determine whether E11 and  
190 EV71 exhibit a polarity of release, we infected HIE with EV71 or E11 from the apical or basolateral  
191 surfaces, respectively, and titrated released progeny viral particles from medium isolated from the  
192 apical or basolateral compartments. These studies revealed that E11 was released from both the  
193 apical and basolateral compartments, although its release was skewed towards the basolateral  
194 compartment **(Figure 2C)**. In contrast, EV71 was solely released from the apical compartment  
195 and no viral particles were detectable in the basolateral compartment **(Figure 2C)**.

196 We next performed growth curves from HIEs infected with EV71 from either the apical or  
197 basolateral surfaces. For these studies, we utilized neutral red (NR)-containing EV71 particles to  
198 distinguish between EV71 particles that remained attached to the cell surface from those that

199 were actively replicating. This technique involves labeling of vRNA with NR, a compound that  
200 crosslinks the vRNA if exposed to light<sup>22, 23</sup>, thus generating viral particles that are rendered non-  
201 infectious when exposed to light. To perform growth curves, NR-EV71 was pre-adsorbed to cells  
202 from the apical or basolateral surfaces under semi-dark conditions and exposed to light  
203 immediately post-binding (0hr) or following viral entry and genome release (6hr p.i.) and then  
204 infected for an additional 24-96hr. NR-EV71 particles that remained at the cell surface would thus  
205 be rendered non-infectious at the 6hr light exposure. Using HIEs prepared from three independent  
206 human tissues and infected as described, we found that EV71 vRNA production peaked by ~24h  
207 p.i. and then was rapidly reduced by 48-72h p.i., with levels diminishing significantly by 96h p.i.  
208 **(Figure 2D)**. This trend was specific for apical infection as only a single preparation exhibited any  
209 detectable vRNA when infection was initiated from the basolateral surface **(Figure 2D)**. In parallel,  
210 we collected cell supernatants from the apical or basolateral compartments and measured  
211 infectious particle release over a 24-96h period. Consistent with our vRNA data, we found that  
212 the levels of infectious EV71 release were highest at 24h p.i., with levels diminishing between 48-  
213 96h p.i. **(Figure 2E)**. Of note, even when low levels of infectious EV71 particles were released  
214 following infection of the basolateral surface, this release was only detectable in the apical  
215 compartment **(Figure 2E)**. Taken together, these data show that EV71 exhibits a strong  
216 preference to infect HIEs from the apical surface and that infectious particles also exhibit an apical  
217 polarity of release.



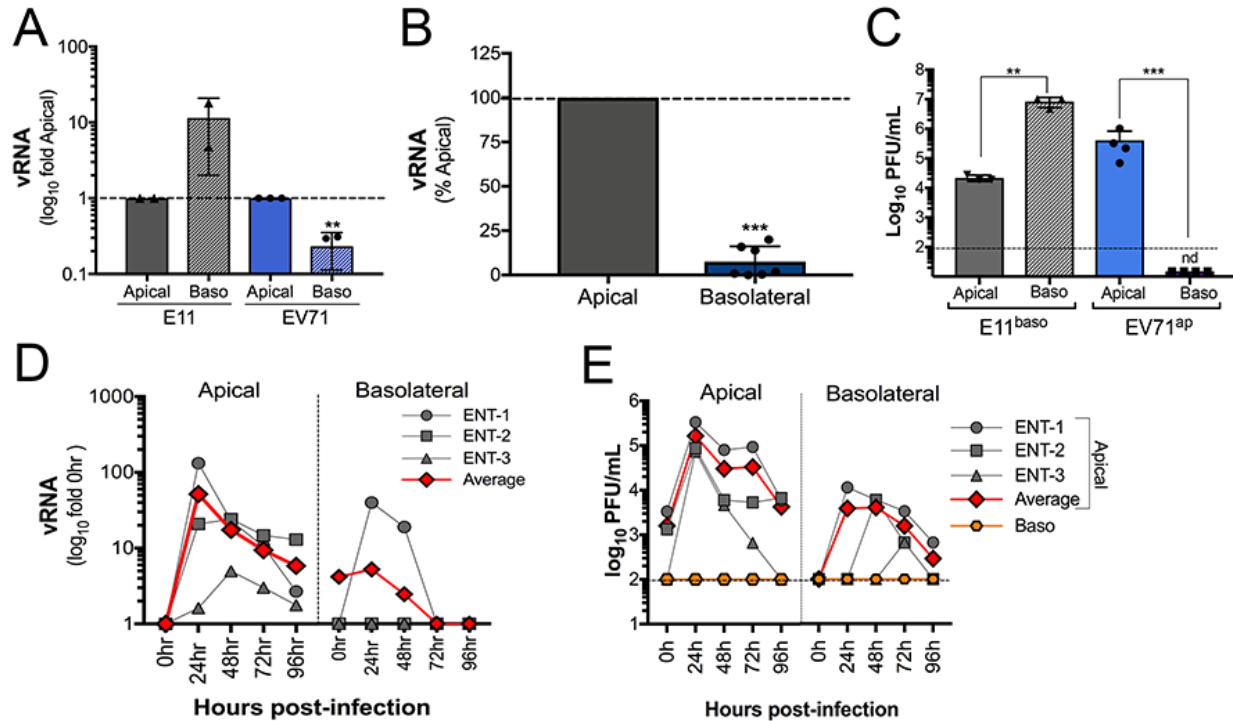

218

219 **Figure 2. EV71 preferentially infects HIEs from the apical surface. (A)**, E11 and EV71  
 220 replication as assessed by the production of vRNA by RT-qPCR when infections were initiated  
 221 from the apical or basolateral surfaces. Data are shown as fold change from apical infections  
 222 (log<sub>10</sub>). Data are from two (E11) or three (EV71 independent HIE cultures. **(B)**, Binding efficiency  
 223 of EV71 when pre-adsorbed to the apical or basolateral surfaces as assessed by RT-qPCR. Data  
 224 are shown as a percent of apical binding and are from four independent HIE preparations. **(C)**,  
 225 E11 and EV71 replication as assessed by titration of virus from the apical or basolateral  
 226 compartments when infection was initiated from the apical (EV71) or basolateral (E11) surfaces.  
 227 Data are from three independent HIE preparations. **(D, E)**, Kinetics of neutral-red labeled EV71  
 228 growth in three independent HIE preparations at the indicated times. Neutral-red labeled EV71  
 229 was pre-adsorbed to the apical or basolateral surfaces for 1hr in the semi-dark, exposed to light  
 230 at 0hr or at 6hr p.i., and then infection allowed to proceed for indicated hr (24-96hr). Infection  
 231 was assessed by production of vRNA by RT-qPCR (D) or viral titration (E) from the apical or  
 232 basolateral (orange) compartments. Note that in (E), no virus was detected in medium isolated  
 233 from the basolateral compartment. Data are from three independent preparations (ENT-1-3, in  
 234 grey). Average is shown in red. In (A-C) data are shown as mean ± standard deviation (\*\*P<0.01,  
 235 \*\*\*P<0.001).  
 236

### 237 EV71 infection of HIE does not alter epithelial barrier function

238 We showed previously that E11 infection of human enteroids grown in Matrigel induced significant  
 239 damage to the epithelium, including reorganization of tight junctions<sup>20</sup>. Consistent with this, we  
 240 found that infection of HIE with E11 from the basolateral surface induced a significant loss of

241 epithelial barrier function, as indicated by the loss of TER values from  $\sim 2000\Omega$  to  $\sim 200\Omega$  (**Figure**  
242 **3A**). In contrast, EV71 infection (from either the apical or basolateral surfaces) had no effect on  
243 TER values (**Figure 3A**), even when infection was allowed to proceed for up to 4 days (**Figure**  
244 **3B**). Likewise, we found that E11 and EV71 also exhibited differences in their impact on epithelial  
245 morphology, with E11 infection inducing loss of actin cytoskeletal integrity which was not present  
246 in EV71-infected HIE (**Figure 3C**). These data highlight differences amongst enteroviruses on  
247 their impact on intestinal epithelial structure and function and show that EV71 infection does not  
248 alter epithelial barrier function.

249

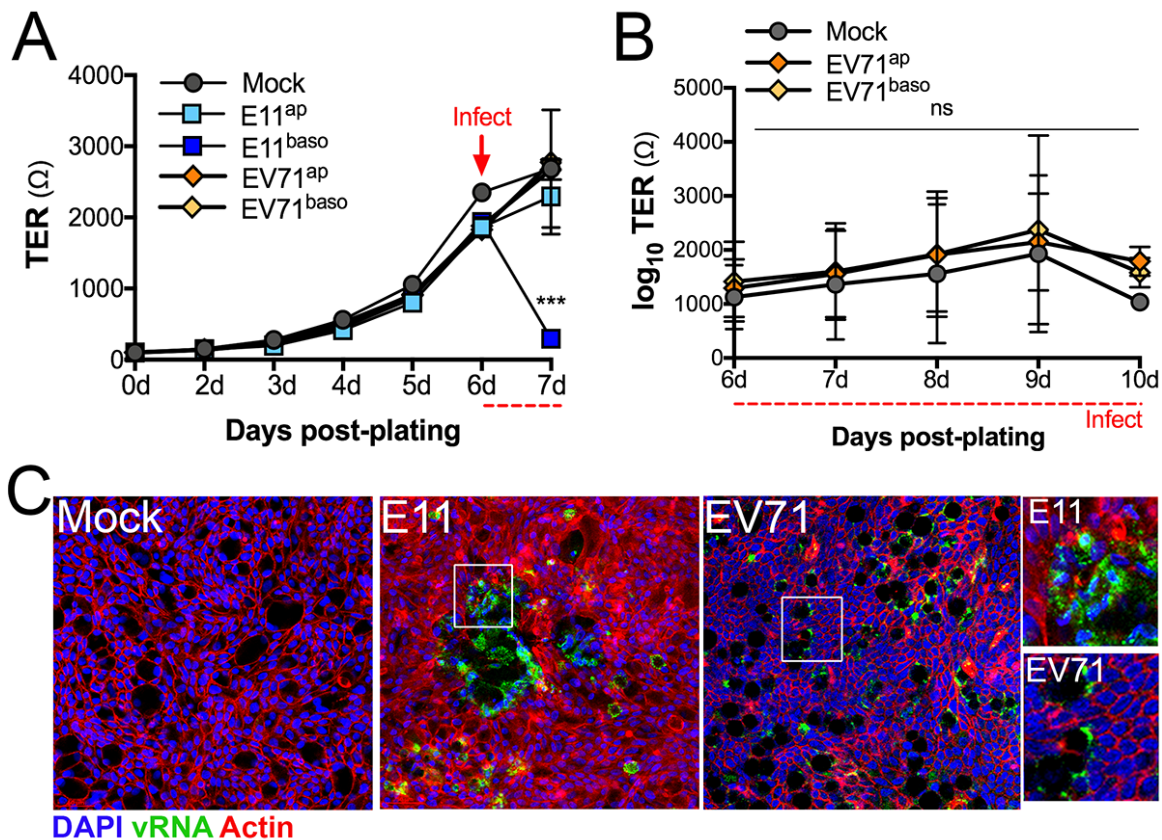

250

251

252 **Figure 3. EV71 infection does not induce loss of epithelial barrier integrity.** (**A**), TER values  
253 at the indicated days post crypt plating in Transwell inserts. At 6d post-plating, Transwells were  
254 infected with E11 or EV71 from the apical or basolateral surfaces (red arrow) and TER values  
255 were measured 24h post-infection. Data are from a single HIE preparation performed in triplicate  
256 and is representative of at least five independent preparations. (**B**), TER values at the indicated  
257 days following infection with EV71 from the apical or basolateral surfaces. Data are from four HIE  
258 preparation performed in duplicate. (**C**), Confocal microscopy for vRNA (green) or actin (red) in

259 mock infected HIE or HIE infected with E11 from the basolateral surface or EV71 from the apical  
260 surface. Images were captured 24h post-infection. Zoomed images from white boxes shown at  
261 right. In (A, B) data are shown as mean  $\pm$  standard deviation (\*\*P<0.001).  
262

### 263 **EV71 infects goblet cells**

264 Because we observed differences in the impact of E11 and EV71 infections on epithelial barrier  
265 function, we next determined whether these viruses exhibited differences in the specific cell types  
266 infected in HIE. We showed previously that E11 preferentially infects enterocytes and can also  
267 infect enteroendocrine cells, but is unable to infect goblet cells<sup>20</sup>. To determine if EV71 also  
268 exhibits a cell type specificity, we first performed immunofluorescence microscopy for double-  
269 stranded vRNA (a replication intermediate) and the virally-encoded capsid protein VP1 in HIE  
270 infected with EV71 from the apical surface for 24h (a time when we observed peak levels of  
271 replication). These studies revealed colocalization of EV71 vRNA and VP1 to punctate structures  
272 in select cells throughout the monolayer (**Figure 4A**). The cells that were positive for EV71 vRNA  
273 and VP1 exhibited characteristics of goblet cells, such as a highly polarized nuclear localization  
274 and large cytoplasmic space (**Figure 4A**, enlarged panel at right). Indeed, follow up studies  
275 confirmed that EV71 vRNA was exclusively localized to mucin-2 (MUC2)-positive goblet cells  
276 (**Figure 4B, 4C**). As an additional confirmation for the goblet cell specificity of EV71 infection, we  
277 also performed immunofluorescence microscopy for VP1 using an immunostaining technique that  
278 distinguishes between VP1 localized on the extracellular surface and VP1 localized  
279 intracellularly<sup>24</sup>. These studies confirmed the presence of intracellular VP1 only in cells exhibiting  
280 goblet cell morphology (**Figure 4D**). Of note, the primary receptor for EV71, SCARB2<sup>12</sup>, was  
281 enriched in goblet cells, where it localized to intracellular vesicles (**Figure 4E**). Consistent with its  
282 infection of goblet cells, we also found that EV71 infection of HIE led to significant decreases in  
283 the expression of MUC2 as assessed by RT-qPCR, suggesting that infection might alter aspects  
284 of goblet cell function (**Figure 4F**). Collectively, these studies show that EV71 specifically infects  
285 via the apical surface of HIE and exhibits preferential infection of goblet cells.

286

287

288

289

290

291

292

293

294

295

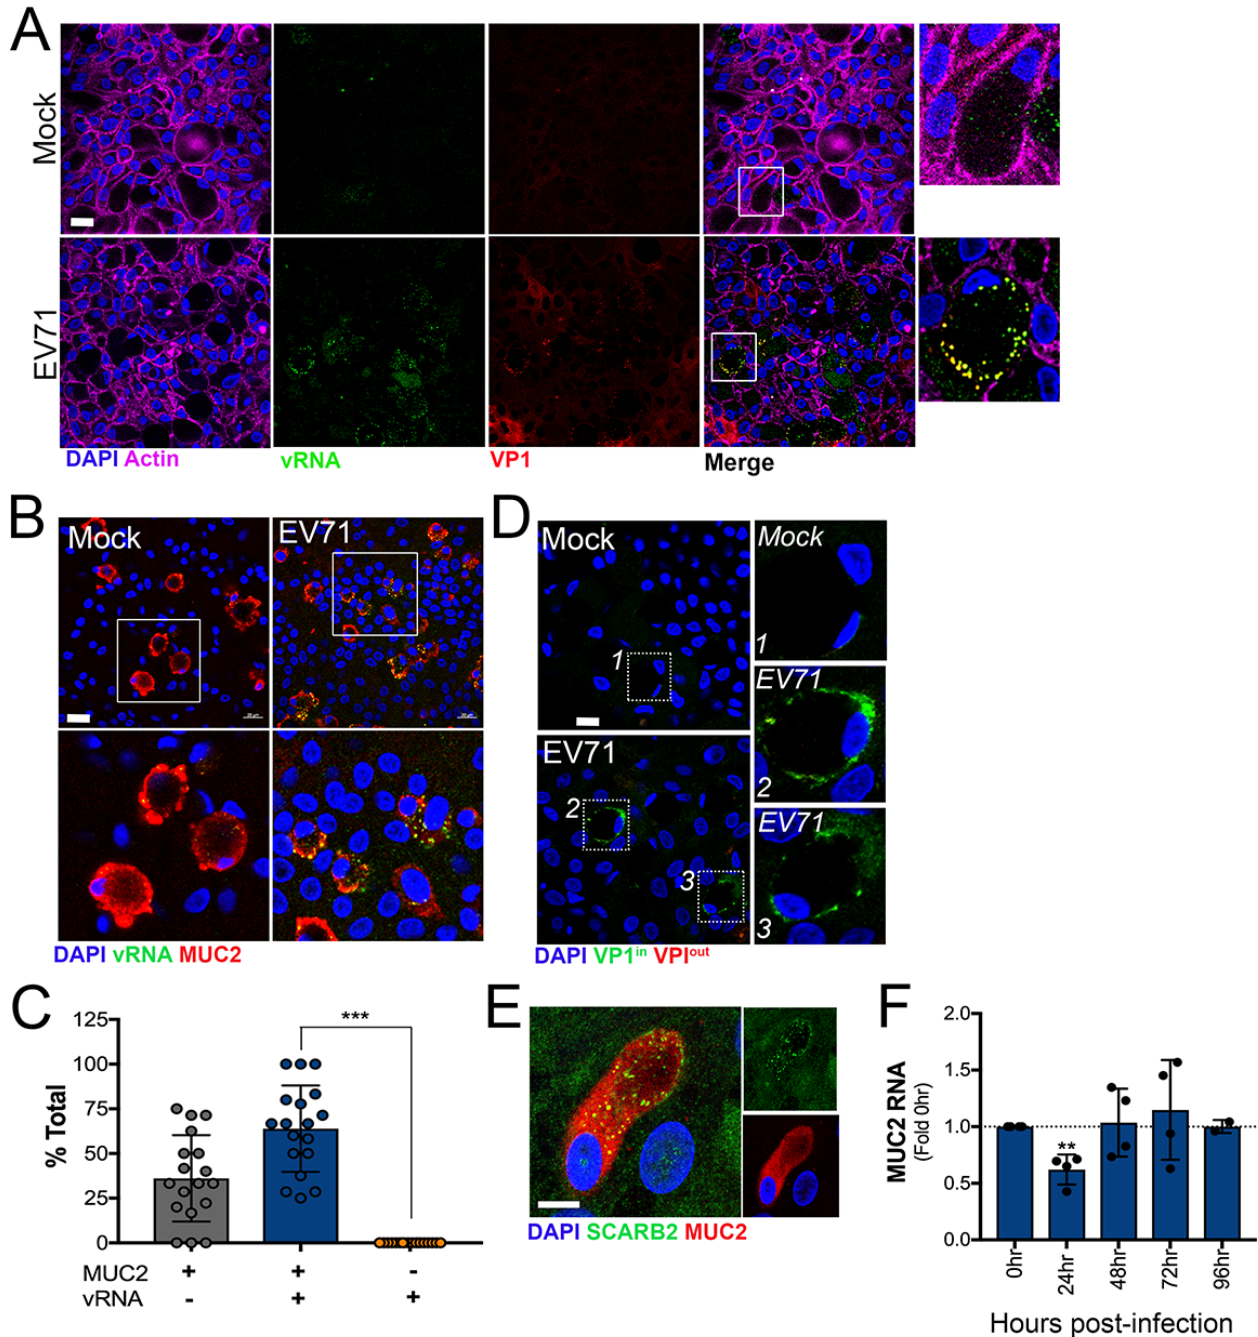

296  
297

298 **Figure 4. EV71 infects goblet cells.** (A), Confocal micrographs from mock- or EV71 apically  
299 infected HIE immunostained for vRNA (green) and VP1 (red) at 24h post-infection. Zoomed  
300 images from areas shown in white boxes shown at right. (B), Confocal micrographs from mock-  
301 or EV71 apically infected HIE immunostained for vRNA (green) and VP1 (red) at 24h post-  
302 infection. Zoomed images from areas shown in white boxes shown at bottom. (C), Quantification  
303 of the extent of colocalization between vRNA and MUC2-positive or -negative cells as assessed  
304 by image analysis. Data were generated from three independent HIE preparations. (E),  
305 Immunofluorescence microscopy for SCARB2 (green) and MUC2 (red) from HIE grown for 7  
306 days. (F), MUC2 expression as assessed by RT-qPCR at the indicated times post-infection (from  
307 the apical surface). with neutral-red labeled EV71 exposed to light immediately post-adsorption

308 (0hr) or at 6hr p.i., and then infection allowed to proceed for the indicated time (in hrs). Data are  
309 shown as a fold change from HIE exposed to light at 0hr and are from four independent HIE  
310 preparations. In (C, D), data are shown as mean  $\pm$  standard deviation (\*\*P<0.01, \*\*\*P<0.001).  
311

### 312 **Type III interferons control EV71 infection of HIE**

313 Our EV71 growth curve studies revealed that the peak of EV71 replication was at 24h p.i., with  
314 levels of infection declining after this time point (**Figure 2D, 2E**). These data suggest that the host  
315 innate immune response to EV71 might suppress viral replication at an early stage in order to  
316 control its replication. To determine if this is the case, we performed RT-qPCR analyses for two  
317 interferon stimulated genes (ISGs), that we previously showed were induced in HIE in response  
318 to E11 infection<sup>20</sup>, in HIE infected with EV71. These studies showed that these ISGs, CXCL10  
319 and IFI44L, were induced by EV71 infection of HIE at 24h p.i., with induction diminishing by 48h-  
320 72h p.i. (**Figure 5A**). We next determine whether type I and/or type III IFNs were responsible for  
321 this induction of ISGs by performing Luminex singleplex assays for IFN $\beta$ , IFN $\lambda$ -1 or, IFN $\lambda$ -2/3 (the  
322 high degree of sequence homology between these IFNs make them indistinguishable in this  
323 assay). We found that EV71 infection of HIE led to the specific induction of type III IFNs,  
324 specifically IFN $\lambda$ -2/3, at both 24h and 48h p.i., with no detectable IFN- $\lambda$ 1 induced and very low  
325 levels of IFN- $\beta$  induced at 24h (**Figure 5B**). Of note, IFNs were present in media collected from  
326 the apical chamber following infection and we were unable to detect any IFNs from media  
327 collected from the basolateral chamber. Likewise, E11 infection also induced the preferential  
328 secretion of type III IFNs, but unlike EV71, but low levels of IFN- $\lambda$ 1 were also produced in  
329 response to infection (**Supplemental Figure 2**). These data suggest that type III IFNs, specifically  
330 IFN- $\lambda$ 2/3, are induced in response to EV71 infection of HIE.

331 Next, we determined whether HIE exhibited differences in their ability to respond to  
332 exogenous type I and III IFNs and whether these IFNs induced ISGs with differing kinetics, as  
333 has been shown in adult enteroids at early time points of exposure<sup>25</sup>. To do this, we first performed  
334 RNASeq transcriptional profiling from HIEs treated with recombinant IFN- $\beta$  or IFN- $\lambda$  for 24h.

335 Differential expression analysis revealed that fetal-derived HIE potently respond to IFN- $\beta$  and IFN-  
336  $\lambda$  and induce the expression of canonical ISGs to similar levels (**Figure 5C, 5D, 5E**). Moreover,  
337 differential expression analysis between IFN- $\beta$  and IFN- $\lambda$  treated HIE showed that only five  
338 transcripts were differentially regulated by IFN- $\beta$ , and four of these transcripts were  
339 downregulated in response to treatment (**Figure 5F**). A kinetic profiling of the responsiveness of  
340 HIE to recombinant IFN- $\beta$  and IFN- $\lambda$  confirmed these findings and showed that there were no  
341 significant differences in the kinetics by which fetal HIE respond to type I or III IFN treatment  
342 (**Supplemental Figure 3**).

343 Finally, we determined whether E11 and EV71 were differentially controlled by type I or III  
344 IFN treatment in a virus- or IFN-specific manner. HIE were pre-treated with recombinant IFN- $\beta$  or  
345 IFN- $\lambda$  for 24h and then infected with E11 or EV71 from the basolateral or apical surfaces,  
346 respectively. We found that whereas E11 was more potently restricted by IFN- $\beta$  treatment as  
347 detected by RT-qPCR for vRNA and viral titration, EV71 was more potently restricted by IFN- $\lambda$   
348 treatment (**Figure 5G, 5H**). Altogether, these data show that HIE specifically induce type III IFNs  
349 in response to EV71 infection, which likely acts to control viral infection at early stages of the viral  
350 life cycle.

351

352

353

354

355

356

357

358

359

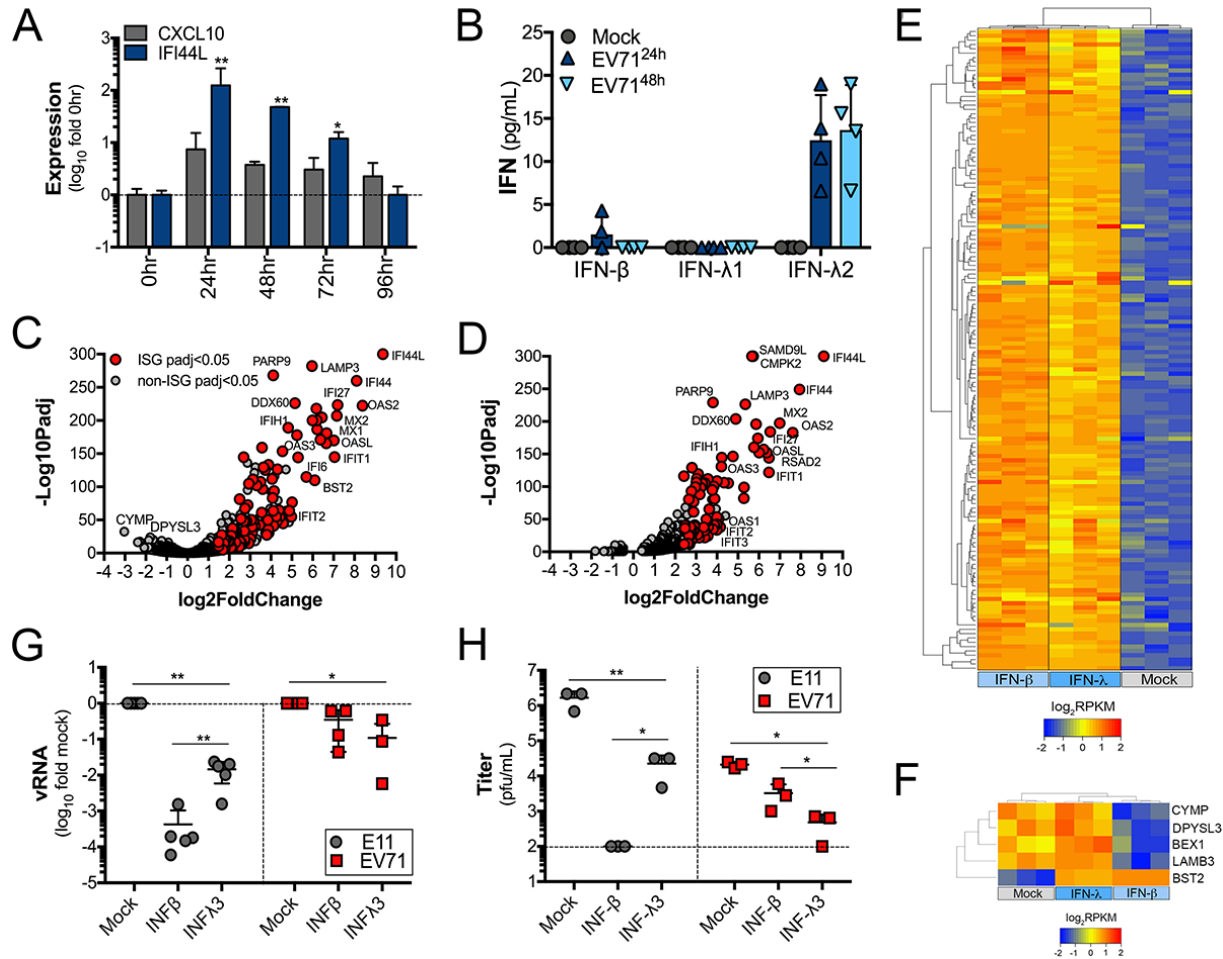

360  
 361  
 362 **Figure 5. EV71 infection of HIE induces type III IFNs.** (A), RT-qPCR for two ISGs, CXCL10  
 363 and IFI44L, in HIE infected with neutral-red labeled EV71 from the apical surface for the indicated  
 364 times. Data are from four independent HIE preparations and are shown as a fold change ( $\log_{10}$ )  
 365 from cultures exposed to light at 0hr. (B), Luminex assays for IFN- $\beta$ , IFN- $\lambda$ 1, or IFN- $\lambda$ 2/3 from  
 366 HIE infected with EV71 from the apical surface for 24h or 48h. Data are shown as pg/mL and are  
 367 from four independent HIE preparations. (C, D), Volcano plots of HIE treated with 500ng IFN- $\beta$   
 368 (C) or IFN- $\lambda$ 1 (D) denoting ISGs (red circles) and non-ISGs (grey circles) differentially expressed  
 369 by treatment ( $P < 0.05$ ). Data are from three independent HIE preparations. (E), Hierarchical  
 370 clustering heatmap (based on  $\log_2$ RPKM values) of canonical ISGs induced by treatment of HIE  
 371 with IFN- $\beta$  or IFN- $\lambda$ 1, or mock treated controls. (G, H), E11 and EV71 infection from HIE pre-  
 372 treated with 500ng IFN- $\beta$  or IFN- $\lambda$ 3 for 24h and then infected with E11 or EV71 for 24h. In (G),  
 373 replication is assessed by vRNA production by RT-qPCR and in (H), viral titration by plaque assay  
 374 was performed. In (A, B, G, H), data are shown as mean  $\pm$  standard deviation (\* $P < 0.05$ , \*\* $P < 0.01$ ,  
 375 \*\*\* $P < 0.001$ ).  
 376

## 377 Discussion

378 The events associated with EV71 infection of the human GI tract are largely unknown. Here we  
 379 show that EV71 preferentially infects HIE from the apical surface where it preferentially replicates



380 in MUC2-positive goblet cells. We also show that unlike E11, an enterovirus that targets  
381 enterocytes, EV71 infection of HIE has no impact on epithelial barrier function or cytoskeletal  
382 morphology, but infection reduces the expression of MUC2, suggesting that its replication may  
383 alter some aspect of goblet cell function. We further show that EV71 infection of HIE induces the  
384 type III IFNs IFN- $\lambda$ 2/3, which likely serve to limit EV71 replication. Collectively, these findings  
385 provide important insights into the mechanisms by which EV71 and other enteroviruses bypass  
386 the GI barrier and point to an important role for type III IFNs in the host response to enterovirus  
387 infections within the GI tract.

388 Our data indicate that enteroviruses exhibit a distinct cell-type specificity by which they  
389 infect the human GI tract in a virus-specific manner. Whereas E11 specifically targets enterocytes  
390 and also infects enteroendocrine cells<sup>20</sup>, EV71 preferentially infects goblet cells. Although it is  
391 possible that EV71 also replicates in other cell types present in HIE at levels that are below the  
392 limit of detection of our assays, our data clearly point to an enrichment of EV71 replication in  
393 goblet cells. The mechanistic basis for the differential cell type specificity between E11 and EV71  
394 remains unclear, although the cell-type specific expression and localization of viral receptors is  
395 likely to play a key role. Although the receptor for E11 is unknown, all EV71 isolates tested to date  
396 utilize SCARB2 as a primary receptor<sup>12, 26</sup>. SCARB2, also known as lysosomal integral membrane  
397 protein II (LIMP2), is an integral membrane protein that specifically localizes to lysosomes and  
398 secretory granules<sup>27</sup>. Indeed, we found that SCARB2 was highly expressed in goblet cells, where  
399 it localized to intracellular vesicles. Goblet cells are characterized by the presence of large  
400 secretory vesicles that function to transport mucus to the apical surface of the epithelium. The  
401 targeting of goblet cells by EV71 for intestinal infection is therefore likely driven at least in part by  
402 the enrichment of SCARB2 to secretory vesicles within these cells, which might expose the  
403 receptor through apical mucus release. It is also possible that EV71 utilizes other apically-  
404 localized attachment factors for its initial binding to the epithelial surface, much like CVB relies on  
405 decay accelerating factor (DAF) to attach to the apical surface<sup>28</sup>, before it reaches SCARB2. EV71

406 has been shown to interact with sialic acid-linked glycans, which might facilitate its initial  
407 attachment to the apical surface of the epithelium<sup>29</sup>. However, this binding is unlikely to be a  
408 primary determinant for goblet cell infection. The cell-type specific nature of enterovirus infections  
409 also suggests that the host response to infection may differ depending on the specific cell types  
410 targeted by a given virus. In support of this, our data also point to important differences in the  
411 impact of E11 and EV71 infection of epithelial structure and barrier function, which could  
412 dramatically impact viral pathogenesis in a virus-specific manner.

413 Our findings implicate type III IFNs as key contributors in the control of enterovirus  
414 infections in the GI tract. These findings are consistent with the work of others who have shown  
415 that human rotaviruses<sup>30-33</sup>, reoviruses<sup>34</sup>, and noroviruses<sup>34-36</sup> are also controlled by intestinal-  
416 derived type III IFNs. However, unlike other enteric viruses such as rotavirus, which controls the  
417 production of type III IFNs during infection through viral antagonism<sup>30</sup>, our findings show that E11  
418 and EV71 infection induce the secretion of type III IFNs at the protein level, suggesting that  
419 enteroviruses may lack this mechanism or be less proficient at suppressing this pathway. In cell  
420 lines, even those of intestinal lineages, EV71 and other enteroviruses potently antagonize the  
421 host innate immune response<sup>37</sup>. This suggests that mechanisms of evasion may differ in primary  
422 cells, particularly those isolated from the GI tract. Our data also show that EV71, but not E11, is  
423 more potently restricted by type III IFNs than type I IFNs. Similar to E11, rotaviruses are also more  
424 sensitive to exogenous treatment with type I IFNs<sup>30</sup>. The mechanistic basis for these differences  
425 in sensitivity are unclear, but our data suggest that at least in the fetal GI tract, these differences  
426 are unlikely to be the result of differences in the magnitude or kinetics of ISG induction between  
427 type I and III IFNs. Instead, these differences may result from differences in the cell type specific  
428 nature of enteric virus infections, with rotaviruses<sup>38</sup> and E11<sup>20</sup> preferentially infecting enterocytes  
429 whereas EV71 targets goblet cells. Dissecting the role of IFNs in the unique cell types of the HIE  
430 will likely provide important clues into the differential role that type I and III IFNs might play in the  
431 GI tract.

432 Our studies suggest that enteroviruses have evolved diverse mechanisms to infect distinct  
433 cell types in the GI epithelium, which likely impacts many aspects of their pathogenesis, including  
434 the role that type III IFNs play in restricting infection and spread. Defining the events associated  
435 with EV71 infection in the GI tract could lead to the identification of novel therapeutic targets  
436 and/or strategies to prevent or treat the pathogenesis and morbidity associated with infections by  
437 this virus.

438

## 439 **Materials and Methods**

### 440 **Cell culture and human enteroids**

441 Human fetal intestinal crypts were isolated and cultured as described previously<sup>20</sup>. Human fetal  
442 tissue (< 24 weeks gestation) that resulted from elective terminations were obtained from the  
443 University of Pittsburgh Health Sciences Tissue Bank through an honest broker system after  
444 approval from the University of Pittsburgh Institutional Review Board and in accordance with the  
445 University of Pittsburgh anatomical tissue procurement guidelines. All tissue was genetically  
446 normal. Approximately 100 isolated crypts were plated into each well of a 24-well T-clear (0.4 $\mu$ m  
447 pore size) transwell insert and were grown in crypt culture media comprised of Advanced  
448 DMEM/F12 (Invitrogen) with 20% Hyclone ES Screened Fetal Bovine Serum (Fisher), 1%  
449 Penicillin/Streptomycin (Invitrogen), 1% L-glutamine, Gentamycin, 0.2% Amphotericin B, 1% N-  
450 acetylcysteine (100mM, Sigma), 1% N-2 supplement (100X, Invitrogen), 2% B27 supplement  
451 (50x, Invitrogen), Gibco® HEPES (N-2-hydroxyethylpiperazine-N-2-ethane sulfonic acid,  
452 0.05mM, Invitrogen), ROCK Inhibitor Y-27632 (1mM, 100x, Sigma) and supplemented with the  
453 following growth factors 100 ng/ml WNT3a (Fisher), 500 ng/ml R-spondin (R&D), 100 ng/ml  
454 Noggin (Peprotech) and 50 ng/ml EGF (Fisher)<sup>39, 40</sup> for the remainder of the respective  
455 experiments, with media changes occurring every 48 hours. Unless otherwise stated, monolayers  
456 of HIE were used in studies at six days post-plating.

457

458 **Viral infections**

459 Experiments were performed with EV-71 (1095), or E11 (Gregory) that were expanded as  
460 described previously<sup>41</sup>. In some cases, experiments were performed with light-sensitive neutral-  
461 red viral particles, which was generated as described previously<sup>24</sup>. Briefly, EV71 was propagated  
462 in the presence of 10 $\mu$ g/mL of neutral red in the semi-dark and was subsequently purified in semi-  
463 dark conditions by ultracentrifugation over a sucrose cushion, as described<sup>41</sup>.

464 For infections, wells were infected with 10<sup>6</sup> PFU of the indicated virus. Virus was pre-  
465 adsorbed to the apical or basolateral surfaces for 1hr at room temperature (basolateral infections  
466 were initiated by inverting the transwell inserts). Infections were then initiated by shifting to 37°C  
467 and allowed to proceed for the times indicated. For neutral red virus experiments, particles were  
468 exposed to light (on a light box) for 20min at 6h p.i. and then infected for the indicated number of  
469 hours post-light exposure. In some cases, cells were exposed immediately following adsorption  
470 (0hr), which served as a control. E11 and EV71 plaque assays were performed in HeLa cells  
471 overlaid with 1.0% or 0.8% agarose respectively; plaques were enumerated following crystal  
472 violet staining.

473 Binding assays were performed by pre-adsorbing 10<sup>6</sup> PFU of the indicated virus to the  
474 apical or basolateral surfaces for 60min at room temperature followed by extensive washing with  
475 1x PBS. Following washing, RNA was isolated immediately, and RT-qPCR performed, as  
476 described below.

477

478 **qPCR and cDNA synthesis**

479 Total RNA was prepared from HIE using the Sigma GenElute total mammalian RNA miniprep kit,  
480 according to the protocol of the manufacturer and using the supplementary Sigma DNase digest  
481 reagent. RNA was reverse transcribed with the iScript cDNA synthesis kit (Bio-Rad), following the  
482 manufacturer's instructions. 1  $\mu$ g of total RNA was reversed transcribed in a 20  $\mu$ L reaction, and  
483 subsequently diluted to 100  $\mu$ L for use. RT-qPCR was performed using the iQ SYBR Green

484 Supermix or iTaq Universal SYBR Green Supermix (Bio-Rad) on a CFX96 Touch Real-Time PCR  
485 Detection System (Bio-Rad). Gene expression was determined based on a  $\Delta C_Q$  method,  
486 normalized to human actin. Primer sequences can be found in Supplemental Table 1.

487

#### 488 **RNASeq**

489 Total RNA was extracted as described above. RNA quality was assessed by NanoDrop and an  
490 Agilent bioanalyzer and 1  $\mu$ g was used for library preparation using the TruSeq Stranded mRNA  
491 Library Preparation kit (Illumina) per the manufacturer's instructions. Sequencing was performed  
492 on an Illumina Nextseq 500. RNAseq FASTQ data were processed and mapped to the human  
493 reference genome (hg38) using CLC Genomics Workbench 11 (Qiagen). CLC Genomics was  
494 also used to determine differentially expressed genes at a significance cutoff of  $p < 0.05$ ,  
495 unless otherwise stated. Hierarchical gene expression clustering was performed using Cluster  
496 3.0, using average linkage clustering of genes centered by their mean RPKM values. Heat maps  
497 (based on  $\log_2(\text{RPKM})$  values) were generated in Heatmapper<sup>42</sup>. Analysis of the transcriptional  
498 profile of Caco-2 cells were based on previously published datasets<sup>43</sup> which were deposited in  
499 sequence read archives (SRA) SRP065330. Files from HIE used in the current study were  
500 deposited in SRA.

501

#### 502 **Immunofluorescence microscopy**

503 Monolayers grown on transwell inserts were washed with PBS and fixed with 4%  
504 paraformaldehyde at room temperature, followed by 0.25% Triton X-100 to permeabilize cell  
505 membranes for 30min at room temperature. Cultures were incubated with primary antibodies for  
506 1 hour at room temperature, washed, and then incubated for 30 minutes at room temperature with  
507 Alexa-Fluor-conjugated secondary antibodies (Invitrogen). Slides were washed and mounted with  
508 Vectashield (Vector Laboratories) containing 4',6-diamidino-2-phenylindole (DAPI). The following  
509 antibodies or reagents were used—recombinant anti-dsRNA antibody (provided by Abraham

510 Brass, University of Massachusetts and described previously<sup>44</sup>), Mucin-2 (H-300, Santa Cruz  
511 Biotechnology), Lysozyme C (E-5, Santa Cruz Biotechnology), E-cadherin (ECCD-2, Invitrogen),  
512 ZO-1 (ZMD.436, Invitrogen), Cytokeratin-19 (EP1580Y, Abcam), VP1 (NCL-ENTERO, Leica),  
513 and SCARB2 (EPR12081, Abcam) and Alexa Fluor 594 or 633 conjugated Phalloidin (Invitrogen).  
514 Images were captured using a Zeiss LSM 710 inverted laser scanning confocal microscope or  
515 with a Leica SP8X tandem scanning confocal microscope with white light laser and contrast  
516 adjusted in Photoshop. Image analysis was performed using Fiji. MUC2 and VP1 positive cells  
517 were counted using the ImageJ Cell Counter plugin.

518

### 519 **Recombinant IFN treatments**

520 HIE monolayers were treated with 100-500ng of recombinant IFN- $\beta$ , IFN- $\lambda$ 1 or IFN- $\lambda$ 3 (R&D  
521 Systems; 1598-IL-025, 5259-IL-025, 8499-IF-010) added to both the apical and basolateral  
522 compartments for ~20h prior to initiating infections, as described above.

523

### 524 **Luminex assays**

525 Luminex profiling was performed using the Human Bio-Plex Pro Inflammation Panel 1 IFN- $\beta$ , IL-  
526 29, and IL28A sets (Bio-Rad) according to the manufacturer's protocol using the laboratory  
527 multianalyte profiling system (LabMAP<sup>TM</sup>) system developed by Luminex Corporation (Austin,  
528 TX).

529

### 530 **Statistics**

531 All statistical analysis was performed using GraphPad Prism. Experiments were performed at  
532 least three times from independent intestines (a total of 29 intestines were used in this study) as  
533 indicated in the figure legends or as detailed. Data are presented as mean  $\pm$  standard deviation.  
534 Except were specified, a Student's t-test was used to determine statistical significance. P values

535 of < 0.05 were considered statistically significant, with specific P-values noted in the figure  
536 legends.

537

### 538 **Acknowledgements**

539

540 We thank Kevin McHugh (Children's Hospital of Pittsburgh) for assistance with Luminex assays,

541 William Horne (Children's Hospital of Pittsburgh) for assistance with RNASeq, Abraham Brass

542 (University of Massachusetts) for providing anti-dsRNA antibody, and Coyne Drummond

543 (University of Pittsburgh) for technical assistance. This project was supported by NIH R01-

544 AI081759 (C.B.C.) and a Burroughs Wellcome Investigators in the Pathogenesis of Infectious

545 Disease Award (C.B.C), and the Children's Hospital of Pittsburgh of the UPMC Health System

546 (C.B.C.). The authors would also like to acknowledge the Tissue and Research Pathology

547 Services/Health Sciences Tissue Bank, which receives funding from P30CA047904.

548

549

550

551

552

553

554

555

556

557

558

559

560

561

562

563

564

565

566

567

568

569

570

571

572

573

574

575 **Literature Cited**

- 576
- 577 1. Yip CC, Lau SK, Woo PC, Yuen KY. Human enterovirus 71 epidemics: what's next?  
578 *Emerg Health Threats J.* 2013;6:19780. Epub 2013/10/15. doi: 10.3402/ehth.v6i0.19780.  
579 PubMed PMID: 24119538; PMCID: PMC3772321.
- 580 2. Schmidt NJ, Lennette EH, Ho HH. An apparently new enterovirus isolated from patients  
581 with disease of the central nervous system. *J Infect Dis.* 1974;129(3):304-9. Epub 1974/03/01.  
582 PubMed PMID: 4361245.
- 583 3. Xing W, Liao Q, Viboud C, Zhang J, Sun J, Wu JT, Chang Z, Liu F, Fang VJ, Zheng Y,  
584 Cowling BJ, Varma JK, Farrar JJ, Leung GM, Yu H. Hand, foot, and mouth disease in China,  
585 2008-12: an epidemiological study. *Lancet Infect Dis.* 2014;14(4):308-18. Epub 2014/02/04. doi:  
586 10.1016/S1473-3099(13)70342-6. PubMed PMID: 24485991; PMCID: PMC4035015.
- 587 4. Wang SM, Liu CC, Tseng HW, Wang JR, Huang CC, Chen YJ, Yang YJ, Lin SJ, Yeh  
588 TF. Clinical spectrum of enterovirus 71 infection in children in southern Taiwan, with an  
589 emphasis on neurological complications. *Clin Infect Dis.* 1999;29(1):184-90. Epub 1999/08/05.  
590 doi: 10.1086/520149. PubMed PMID: 10433583.
- 591 5. Chang LY, Lin TY, Hsu KH, Huang YC, Lin KL, Hsueh C, Shih SR, Ning HC, Hwang MS,  
592 Wang HS, Lee CY. Clinical features and risk factors of pulmonary oedema after enterovirus-71-  
593 related hand, foot, and mouth disease. *Lancet.* 1999;354(9191):1682-6. Epub 1999/11/24. doi:  
594 10.1016/S0140-6736(99)04434-7. PubMed PMID: 10568570.
- 595 6. Liu CC, Tseng HW, Wang SM, Wang JR, Su IJ. An outbreak of enterovirus 71 infection  
596 in Taiwan, 1998: epidemiologic and clinical manifestations. *J Clin Virol.* 2000;17(1):23-30. Epub  
597 2000/05/18. PubMed PMID: 10814935.
- 598 7. Chen YC, Yu CK, Wang YF, Liu CC, Su IJ, Lei HY. A murine oral enterovirus 71  
599 infection model with central nervous system involvement. *J Gen Virol.* 2004;85(Pt 1):69-77.  
600 Epub 2004/01/14. doi: 10.1099/vir.0.19423-0. PubMed PMID: 14718621.
- 601 8. Wang YF, Chou CT, Lei HY, Liu CC, Wang SM, Yan JJ, Su IJ, Wang JR, Yeh TM, Chen  
602 SH, Yu CK. A mouse-adapted enterovirus 71 strain causes neurological disease in mice after  
603 oral infection. *J Virol.* 2004;78(15):7916-24. Epub 2004/07/16. doi: 10.1128/JVI.78.15.7916-  
604 7924.2004. PubMed PMID: 15254164; PMCID: PMC446098.
- 605 9. Zhang Y, Cui W, Liu L, Wang J, Zhao H, Liao Y, Na R, Dong C, Wang L, Xie Z, Gao J,  
606 Cui P, Zhang X, Li Q. Pathogenesis study of enterovirus 71 infection in rhesus monkeys. *Lab*  
607 *Invest.* 2011;91(9):1337-50. Epub 2011/05/11. doi: 10.1038/labinvest.2011.82. PubMed PMID:  
608 21555996.
- 609 10. Khong WX, Yan B, Yeo H, Tan EL, Lee JJ, Ng JK, Chow VT, Alonso S. A non-mouse-  
610 adapted enterovirus 71 (EV71) strain exhibits neurotropism, causing neurological manifestations  
611 in a novel mouse model of EV71 infection. *J Virol.* 2012;86(4):2121-31. Epub 2011/12/02. doi:  
612 10.1128/JVI.06103-11. PubMed PMID: 22130542; PMCID: PMC3302383.
- 613 11. Fujii K, Nagata N, Sato Y, Ong KC, Wong KT, Yamayoshi S, Shimanuki M, Shitara H,  
614 Taya C, Koike S. Transgenic mouse model for the study of enterovirus 71 neuropathogenesis.



- 615 Proc Natl Acad Sci U S A. 2013;110(36):14753-8. Epub 2013/08/21. doi:  
616 10.1073/pnas.1217563110. PubMed PMID: 23959904; PMCID: PMC3767555.
- 617 12. Yamayoshi S, Yamashita Y, Li J, Hanagata N, Minowa T, Takemura T, Koike S.  
618 Scavenger receptor B2 is a cellular receptor for enterovirus 71. *Nat Med*. 2009;15(7):798-801.  
619 Epub 2009/06/23. doi: 10.1038/nm.1992. PubMed PMID: 19543282.
- 620 13. Nagata N, Shimizu H, Ami Y, Tano Y, Harashima A, Suzaki Y, Sato Y, Miyamura T, Sata  
621 T, Iwasaki T. Pyramidal and extrapyramidal involvement in experimental infection of  
622 cynomolgus monkeys with enterovirus 71. *J Med Virol*. 2002;67(2):207-16. Epub 2002/05/07.  
623 doi: 10.1002/jmv.2209. PubMed PMID: 11992581.
- 624 14. Nagata N, Iwasaki T, Ami Y, Tano Y, Harashima A, Suzaki Y, Sato Y, Hasegawa H,  
625 Sata T, Miyamura T, Shimizu H. Differential localization of neurons susceptible to enterovirus 71  
626 and poliovirus type 1 in the central nervous system of cynomolgus monkeys after intravenous  
627 inoculation. *J Gen Virol*. 2004;85(Pt 10):2981-9. Epub 2004/09/28. doi: 10.1099/vir.0.79883-0.  
628 PubMed PMID: 15448361.
- 629 15. Sato T, van Es JH, Snippert HJ, Stange DE, Vries RG, van den Born M, Barker N,  
630 Shroyer NF, van de Wetering M, Clevers H. Paneth cells constitute the niche for Lgr5 stem cells  
631 in intestinal crypts. *Nature*. 2011;469(7330):415-8. Epub 2010/11/30. doi: 10.1038/nature09637.  
632 PubMed PMID: 21113151; PMCID: PMC3547360.
- 633 16. Kretschmar K, Clevers H. Organoids: Modeling Development and the Stem Cell Niche  
634 in a Dish. *Dev Cell*. 2016;38(6):590-600. doi: 10.1016/j.devcel.2016.08.014. PubMed PMID:  
635 27676432.
- 636 17. In JG, Foulke-Abel J, Estes MK, Zachos NC, Kovbasnjuk O, Donowitz M. Human mini-  
637 guts: new insights into intestinal physiology and host-pathogen interactions. *Nat Rev*  
638 *Gastroenterol Hepatol*. 2016. doi: 10.1038/nrgastro.2016.142. PubMed PMID: 27677718.
- 639 18. Date S, Sato T. Mini-gut organoids: reconstitution of the stem cell niche. *Annu Rev Cell*  
640 *Dev Biol*. 2015;31:269-89. doi: 10.1146/annurev-cellbio-100814-125218. PubMed PMID:  
641 26436704.
- 642 19. Lanik WE, Mara MA, Mihi B, Coyne CB, Good M. Stem Cell-Derived Models of Viral  
643 Infections in the Gastrointestinal Tract. *Viruses*. 2018;10(3). Epub 2018/03/15. doi:  
644 10.3390/v10030124. PubMed PMID: 29534451; PMCID: PMC5869517.
- 645 20. Drummond CG, Bolock AM, Ma C, Luke CJ, Good M, Coyne CB. Enteroviruses infect  
646 human enteroids and induce antiviral signaling in a cell lineage-specific manner. *Proc Natl Acad*  
647 *Sci U S A*. 2017;114(7):1672-7. Epub 2017/02/01. doi: 10.1073/pnas.1617363114. PubMed  
648 PMID: 28137842; PMCID: PMC5320971.
- 649 21. In JG, Foulke-Abel J, Estes MK, Zachos NC, Kovbasnjuk O, Donowitz M. Human mini-  
650 guts: new insights into intestinal physiology and host-pathogen interactions. *Nat Rev*  
651 *Gastroenterol Hepatol*. 2016;13(11):633-42. Epub 2016/10/26. doi: 10.1038/nrgastro.2016.142.  
652 PubMed PMID: 27677718; PMCID: PMC5079760.

- 653 22. Crowther D, Melnick JL. The incorporation of neutral red and acridine orange into  
654 developing poliovirus particles making them photosensitive. *Virology*. 1961;14:11-21. PubMed  
655 PMID: 13696675.
- 656 23. Brandenburg B, Lee LY, Lakadamyali M, Rust MJ, Zhuang X, Hogle JM. Imaging  
657 poliovirus entry in live cells. *PLoS Biol*. 2007;5(7):e183. doi: 10.1371/journal.pbio.0050183.
- 658 24. Delorme-Axford E, Sadovsky Y, Coyne CB. Lipid raft- and SRC family kinase-dependent  
659 entry of coxsackievirus B into human placental trophoblasts. *J Virol*. 2013;87(15):8569-81. Epub  
660 2013/05/31. doi: 10.1128/JVI.00708-13. PubMed PMID: 23720726; PMCID: PMC3719791.
- 661 25. Pervolaraki K, Stanifer ML, Munchau S, Renn LA, Albrecht D, Kurzhals S, Senis E,  
662 Grimm D, Schroder-Braunstein J, Rabin RL, Boulant S. Type I and Type III Interferons Display  
663 Different Dependency on Mitogen-Activated Protein Kinases to Mount an Antiviral State in the  
664 Human Gut. *Front Immunol*. 2017;8:459. Epub 2017/05/10. doi: 10.3389/fimmu.2017.00459.  
665 PubMed PMID: 28484457; PMCID: PMC5399069.
- 666 26. Yamayoshi S, Iizuka S, Yamashita T, Minagawa H, Mizuta K, Okamoto M, Nishimura H,  
667 Sanjoh K, Katsushima N, Itagaki T, Nagai Y, Fujii K, Koike S. Human SCARB2-dependent  
668 infection by coxsackievirus A7, A14, and A16 and enterovirus 71. *J Virol*. 2012;86(10):5686-96.  
669 Epub 2012/03/23. doi: 10.1128/JVI.00020-12. PubMed PMID: 22438546; PMCID:  
670 PMC3347270.
- 671 27. Vega MA, Segui-Real B, Garcia JA, Cales C, Rodriguez F, Vanderkerckhove J,  
672 Sandoval IV. Cloning, sequencing, and expression of a cDNA encoding rat LIMP II, a novel 74-  
673 kDa lysosomal membrane protein related to the surface adhesion protein CD36. *J Biol Chem*.  
674 1991;266(25):16818-24. Epub 1991/09/05. PubMed PMID: 1715871.
- 675 28. Shieh JT, Bergelson JM. Interaction with decay-accelerating factor facilitates  
676 coxsackievirus B infection of polarized epithelial cells. *J Virol*. 2002;76(18):9474-80. Epub  
677 2002/08/21. PubMed PMID: 12186929; PMCID: PMC136423.
- 678 29. Yang B, Chuang H, Yang KD. Sialylated glycans as receptor and inhibitor of enterovirus  
679 71 infection to DLD-1 intestinal cells. *Viol J*. 2009;6:141. Epub 2009/09/16. doi: 10.1186/1743-  
680 422X-6-141. PubMed PMID: 19751532; PMCID: PMC2751754.
- 681 30. Saxena K, Simon LM, Zeng XL, Blutt SE, Crawford SE, Sastri NP, Karandikar UC, Ajami  
682 NJ, Zachos NC, Kovbasnjuk O, Donowitz M, Conner ME, Shaw CA, Estes MK. A paradox of  
683 transcriptional and functional innate interferon responses of human intestinal enteroids to  
684 enteric virus infection. *Proc Natl Acad Sci U S A*. 2017;114(4):E570-E9. Epub 2017/01/11. doi:  
685 10.1073/pnas.1615422114. PubMed PMID: 28069942; PMCID: PMC5278484.
- 686 31. Hernandez PP, Mahlakoiv T, Yang I, Schwierzeck V, Nguyen N, Guendel F, Gronke K,  
687 Ryffel B, Hoelscher C, Dumoutier L, Renauld JC, Suerbaum S, Staeheli P, Diefenbach A.  
688 Interferon-lambda and interleukin 22 act synergistically for the induction of interferon-stimulated  
689 genes and control of rotavirus infection. *Nat Immunol*. 2015;16(7):698-707. Epub 2015/05/26.  
690 doi: 10.1038/ni.3180. PubMed PMID: 26006013; PMCID: PMC4589158.
- 691 32. Pott J, Mahlakoiv T, Mordstein M, Duerr CU, Michiels T, Stockinger S, Staeheli P,  
692 Hornef MW. IFN-lambda determines the intestinal epithelial antiviral host defense. *Proc Natl*

- 693 Acad Sci U S A. 2011;108(19):7944-9. Epub 2011/04/27. doi: 10.1073/pnas.1100552108.  
694 PubMed PMID: 21518880; PMCID: PMC3093475.
- 695 33. Lin JD, Feng N, Sen A, Balan M, Tseng HC, McElrath C, Smirnov SV, Peng J,  
696 Yasukawa LL, Durbin RK, Durbin JE, Greenberg HB, Kotenko SV. Distinct Roles of Type I and  
697 Type III Interferons in Intestinal Immunity to Homologous and Heterologous Rotavirus  
698 Infections. *PLoS Pathog.* 2016;12(4):e1005600. Epub 2016/04/30. doi:  
699 10.1371/journal.ppat.1005600. PubMed PMID: 27128797; PMCID: PMC4851417.
- 700 34. Baldrige MT, Lee S, Brown JJ, McAllister N, Urbanek K, Dermody TS, Nice TJ, Virgin  
701 HW. Expression of *Ifnlr1* on Intestinal Epithelial Cells Is Critical to the Antiviral Effects of  
702 Interferon Lambda against Norovirus and Reovirus. *J Virol.* 2017;91(7). Epub 2017/01/13. doi:  
703 10.1128/JVI.02079-16. PubMed PMID: 28077655; PMCID: PMC5355594.
- 704 35. Nice TJ, Baldrige MT, McCune BT, Norman JM, Lazear HM, Artyomov M, Diamond  
705 MS, Virgin HW. Interferon-lambda cures persistent murine norovirus infection in the absence of  
706 adaptive immunity. *Science.* 2015;347(6219):269-73. Epub 2014/11/29. doi:  
707 10.1126/science.1258100. PubMed PMID: 25431489; PMCID: PMC4398891.
- 708 36. Baldrige MT, Nice TJ, McCune BT, Yokoyama CC, Kambal A, Wheadon M, Diamond  
709 MS, Ivanova Y, Artyomov M, Virgin HW. Commensal microbes and interferon-lambda determine  
710 persistence of enteric murine norovirus infection. *Science.* 2015;347(6219):266-9. Epub  
711 2014/11/29. doi: 10.1126/science.1258025. PubMed PMID: 25431490; PMCID: PMC4409937.
- 712 37. Harris KG, Coyne CB. Enter at your own risk: how enteroviruses navigate the dangerous  
713 world of pattern recognition receptor signaling. *Cytokine.* 2013;63(3):230-6. Epub 2013/06/15.  
714 doi: 10.1016/j.cyto.2013.05.007. PubMed PMID: 23764548; PMCID: PMC3987772.
- 715 38. Saxena K, Blutt SE, Ettayebi K, Zeng XL, Broughman JR, Crawford SE, Karandikar UC,  
716 Sastri NP, Conner ME, Opekun AR, Graham DY, Qureshi W, Sherman V, Foulke-Abel J, In J,  
717 Kovbasnjuk O, Zachos NC, Donowitz M, Estes MK. Human Intestinal Enteroids: a New Model  
718 To Study Human Rotavirus Infection, Host Restriction, and Pathophysiology. *J Virol.*  
719 2016;90(1):43-56. Epub 2015/10/09. doi: 10.1128/JVI.01930-15. PubMed PMID: 26446608;  
720 PMCID: PMC4702582.
- 721 39. Shaffiey SA, Jia H, Keane T, Costello C, Wasserman D, Quidgley M, Dziki J, Badylak S,  
722 Sodhi CP, March JC, Hackam DJ. Intestinal stem cell growth and differentiation on a tubular  
723 scaffold with evaluation in small and large animals. *Regen Med.* 2016;11(1):45-61. doi:  
724 10.2217/rme.15.70. PubMed PMID: 26395928; PMCID: PMC4891976.
- 725 40. Egan CE, Sodhi CP, Good M, Lin J, Jia H, Yamaguchi Y, Lu P, Ma C, Branca MF,  
726 Weyandt S, Fulton WB, Nino DF, Prindle T, Jr., Ozolek JA, Hackam DJ. Toll-like receptor 4-  
727 mediated lymphocyte influx induces neonatal necrotizing enterocolitis. *J Clin Invest.*  
728 2016;126(2):495-508. doi: 10.1172/JCI83356. PubMed PMID: 26690704; PMCID:  
729 PMC4731173.
- 730 41. Morosky S, Lennemann NJ, Coyne CB. BPIFB6 Regulates Secretory Pathway  
731 Trafficking and Enterovirus Replication. *J Virol.* 2016;90(10):5098-107. doi: 10.1128/JVI.00170-  
732 16. PubMed PMID: 26962226; PMCID: PMC4859712.

- 733 42. Babicki S, Arndt D, Marcu A, Liang Y, Grant JR, Maciejewski A, Wishart DS.  
734 Heatmapper: web-enabled heat mapping for all. *Nucleic Acids Res.* 2016;44(W1):W147-53.  
735 Epub 2016/05/18. doi: 10.1093/nar/gkw419. PubMed PMID: 27190236; PMCID: PMC4987948.
- 736 43. Drummond CG, Nickerson CA, Coyne CB. A Three-Dimensional Cell Culture Model To  
737 Study Enterovirus Infection of Polarized Intestinal Epithelial Cells. *mSphere.* 2016;1(1). doi:  
738 10.1128/mSphere.00030-15. PubMed PMID: 27303677; PMCID: PMC4863623.
- 739 44. Savidis G, Perreira JM, Portmann JM, Meraner P, Guo Z, Green S, Brass AL. The  
740 IFITMs Inhibit Zika Virus Replication. *Cell Rep.* 2016;15(11):2323-30. doi:  
741 10.1016/j.celrep.2016.05.074. PubMed PMID: 27268505.  
742

## Supplemental Figure 1

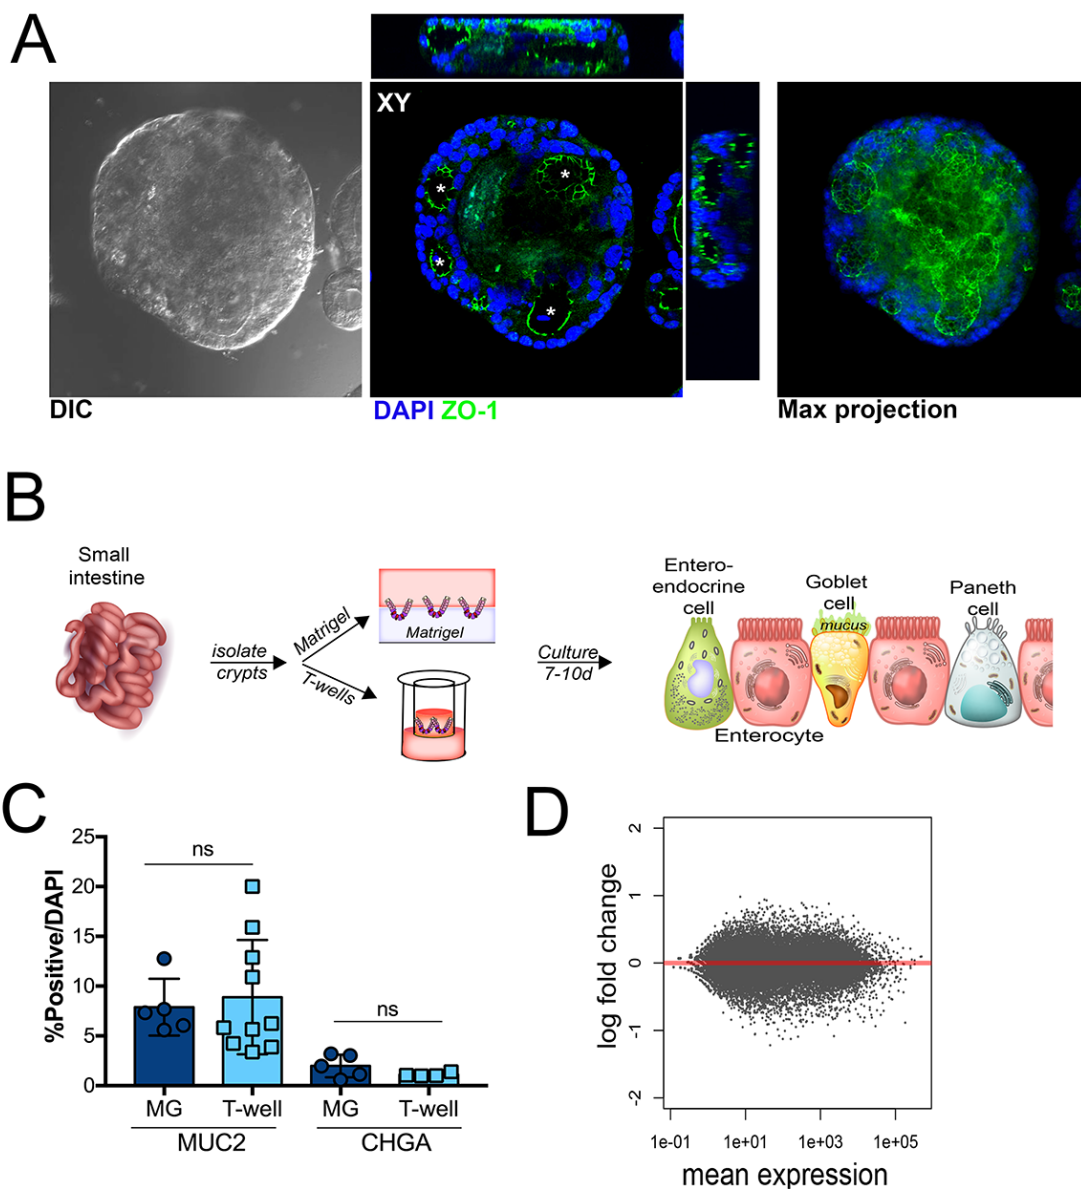

**Supplemental Figure 1. (A)**, Confocal micrograph of enteroid grown in Matrigel for 7 days and immunostained for ZO-1 (in green). DAPI-stained nuclei are shown in blue. At middle, xzy and xyz cross-sections are shown at top and right. At right, maximum projection is shown. **(B)**, Schematic of the isolation and culturing of isolated crypts in Matrigel or on Transwells. **(C)**, Quantification of the numbers of MUC2 and CHGA positive cells from crypts isolated and grown in Matrigel (MG) or on Transwell inserts (T-well) (normalized to DAPI). Data are shown as mean  $\pm$  standard deviation and were calculated from three independent preparations. **(D)**, MA plot generated in R following DeSeq2 analysis demonstrating the differential expression of transcripts between crypts cultured in Matrigel or on Transwell inserts. Data are plotted as log<sub>2</sub> fold changes (y-axis) and mean expression (x-axis). Grey denotes transcripts not differentially expressed ( $p < 0.05$ ).

## Supplemental Figure 2

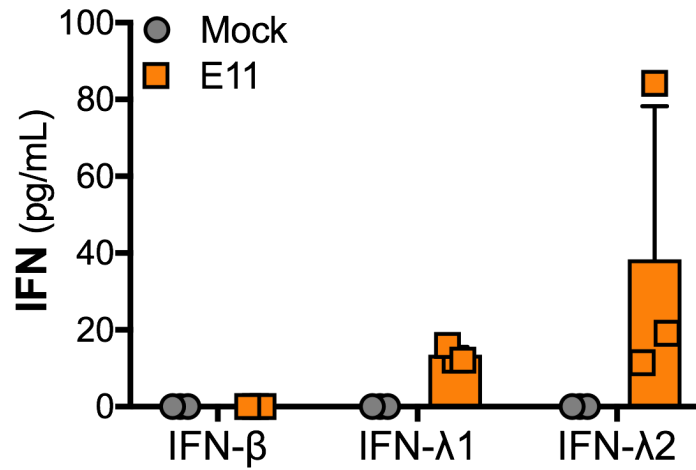

**Supplemental Figure 2.** Luminex assays for IFN-β, IFN-λ1, or IFNλ-2/3 from enteroids infected with E11 for 24h. Data are shown as pg/mL and are from three independent preparations

### Supplemental Figure 3

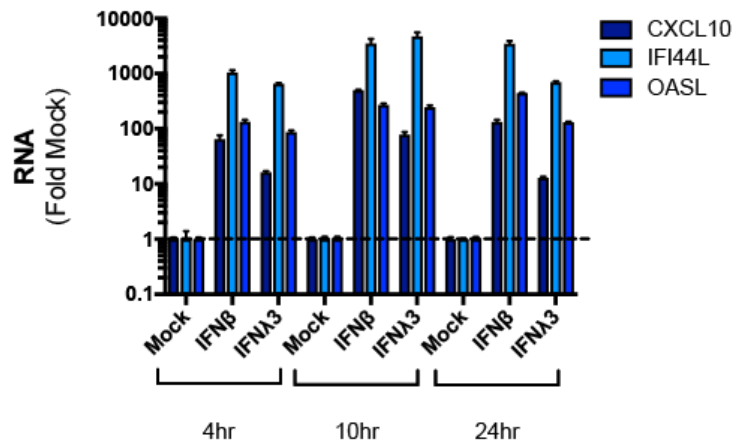

**Supplemental Figure 3.** RT-qPCR for the ISGs CXCL10, IFI44L, and OASL from human enteroids treated with 100ng/mL of IFN- $\beta$  or IFN- $\lambda$ 3 for the indicated times. Data are shown as mean  $\pm$  standard deviation normalized to mock-treated controls.

### Supplemental Table 1. Primers used in this study

| Target | Forward, 5'-3'         | Reverse, 5'-3'          |
|--------|------------------------|-------------------------|
| Actin  | ACTGGGACGACATGGAGAAAAA | GCCACACGCAGCTC          |
| ALPL   | ATCTCATGGGCCTCTTTG     | GCCTCTGTCATCTCCATC      |
| CHGA   | GAATAAAGGGGATACCGAGG   | AGTGTCTCAAACATTCCTG     |
| CXCL10 | AAAGCAGTTAGCAAGGAAAG   | TCATTGGTCACCTTTTAGTG    |
| Echo11 | CGCTATGGCTACGGGTAAAT   | GCAGTCCAACATCCCAGATAA   |
| EV71   | GAGAGTTCTATAGGGGACAGT  | AGCTGTGCTATGTGAATTAGGAA |
| IFI44L | AACCTAGACGACATAAAGAGG  | CTGAAACCAAGTCTGCATAG    |
| LGR5   | ACCCGCCAGTCTCCTACATC   | GCATCTAGGCGCAGGGATTG    |
| MUC2   | GATTCGAAGTGAAGAGCAAG   | CACTTGGAGGAATAAACTGG    |
| OASL   | GTACCAGCAGTATGTGAAAG   | ATGGTTAGAAGTTCAAGAGC    |
| REG3A  | TACTCATCGTCTGGATTGG    | ATCTTTCCACCTCAGAAATG    |
| SI     | ATAGACACCTATGAAAGAGACC | CATACATGAAGGGATCCAAG    |
